# Supplementary material
Source: publisher figshare collection journal article supplement (https://geolsoc.figshare.com/ndownloader/files/22412010)
Supplement: Supplementary file 1 [file 22412010]

## Sheet: Whole-rock geochemistry
Geochemical data, Mofjell Group
Sample	Description	UTM_E33	UTM_N33	SiO2	Al2O3	Fe2O3	CaO	MgO	Na2O	K2O	TiO2	MnO	P2O5	LOI	Total	Ba	Ce	Co	Cr	Cs	Cu	Dy	Er	Eu	Ga	Gd	Hf	Ho	La	Lu	Nb	Nd	Ni	Pb	Pr	Rb	Sm	Sr	Ta	Tb	Th	Tm	U	V	Y	Yb	Zn	Zr
MO 036	Amphibolite	473678	7352338	53.1	14.67	10.78	8.58	7.67	3.18	0.31	0.35	0.27	0.044	0.85	99.85	26.2	4.9	38.8	130	0.08	7	1.67	1.17	0.36	13.3	1.25	0.6	0.36	2.1	0.2	1	3.1	41	6	0.63	1.2	1.03	95.2	<0.1	0.23	0.4	0.19	0.26	254	9.9	1.19	139	7
MO 042	Amphibolite	473277	7354858	49.46	19.73	11.16	9.64	4.74	2.55	1.01	0.75	0.17	0.102	0.38	99.79	477	23.3	26.8	30	1.11	33	2.99	1.96	0.93	15.2	3.07	1.2	0.67	9.9	0.27	1.5	12.7	9	7	3.03	37.8	2.86	339	0.1	0.51	3.02	0.3	0.8	204	16.8	1.99	79	21
MO 043	Amphibolite	473224	7354845	51.96	18.92	11.08	6.58	5.37	4.41	0.41	0.64	0.15	0.076	0.26	99.9	122.5	19.6	28.8	10	0.37	32	3	1.83	0.78	15.9	2.66	1.6	0.62	9.8	0.27	1.8	10.7	<5	7	2.52	7.7	2.62	224	0.1	0.49	2.35	0.27	0.5	238	16.1	1.83	83	37
MO 052	Amphibolite	467851	7351907	48.6	16.15	10.18	11.29	4.86	4.23	0.53	0.47	0.17	0.054	3.26	99.84	86.9	5.5	34.8	70	0.03	72	2	1.26	0.46	13.4	1.45	0.8	0.43	1.2	0.21	0.5	3.6	26	12	0.76	7.4	1.06	199.5	<0.1	0.28	0.48	0.2	0.2	280	11.5	1.28	79	8
MO 060	Amphibolite	464262	7349882	45.98	15.95	10.77	11.65	9.78	3	0.35	0.44	0.15	0.031	1.53	99.79	15.6	2.3	54.3	960	0.02	71	1.58	1.07	0.26	13.2	1.12	0.6	0.35	0.7	0.17	0.2	1.9	242	<5	0.36	5.2	0.71	145	<0.1	0.21	0.21	0.15	0.24	352	8.8	1.11	91	3
MO 065	Amphibolite	466715	7349439	49.61	17.54	13.64	10.17	6.03	1.48	0.26	0.55	0.2	0.043	0.3	99.84	24.7	6.7	42.5	10	<0.01	26	1.63	1.15	0.37	16.8	1.24	0.7	0.36	3.2	0.18	1.1	3.5	16	7	0.88	2.1	0.93	141	0.1	0.24	1.11	0.17	0.45	388	8.7	1.16	106	5
MO 067-2	Amphibolite	467666	7346939	47.02	15.74	10.88	10.08	9.67	2.79	0.41	1.42	0.17	0.099	0.86	99.23	21.5	15.4	46.1	440	0.01	<5	4.52	2.53	1.49	16.1	4.29	2	0.95	6.1	0.35	3.4	12.9	192	64	2.57	1.3	3.88	115	0.2	0.77	0.35	0.36	0.38	185	24.9	2.33	198	75
MO 084-2	Amphibolite	468136	7346848	52.4	17.92	10.43	4.79	4.89	4.7	2.29	1.28	0.15	0.174	0.81	99.92	489	20.5	34.4	80	0.84	<5	3.75	2.21	1.15	16.4	3.64	1.9	0.76	8.2	0.3	3	12.2	39	6	2.67	54.7	3.08	155.5	0.1	0.56	1.48	0.29	0.29	217	19.2	1.96	84	67
MO 085	Amphibolite	468117	7346904	49.68	16.59	11.86	9.59	7.11	2.14	0.62	0.81	0.16	0.085	0.62	99.31	50.3	10.7	34.9	120	0.01	11	3.39	2.2	0.81	16.8	2.9	1	0.71	4.8	0.3	1.7	8.1	47	<5	1.84	2.6	2.45	185	<0.1	0.53	0.57	0.3	0.21	317	18.3	2.06	82	25
MO 088	Amphibolite	468290	7346811	48.78	15.57	9.83	10.62	9.45	2.24	0.73	0.66	0.15	0.068	0.86	99.06	105.5	7.9	42.6	510	0.02	<5	2.73	1.65	0.64	14.8	2.26	1.3	0.54	2.8	0.23	1.2	5.6	126	5	1.11	3.4	1.57	165	<0.1	0.38	0.66	0.23	0.25	251	14	1.6	75	38
MO 089	Amphibolite	468313	7346803	50.12	15.69	10.05	9.34	9.24	2.36	1.04	0.68	0.15	0.079	0.97	99.82	130	7.9	40.9	470	0.55	<5	2.76	1.86	0.66	14.9	2.28	1.1	0.61	2.4	0.26	1.2	5.7	117	6	1.13	14.2	1.83	130.5	<0.1	0.42	0.67	0.28	0.2	261	14.9	1.81	80	33
MO 100	Amphibolite	468064	7352127	56.63	18.18	9.38	8.35	3.63	2.28	0.3	0.53	0.11	0.048	0.23	99.71	70.2	5.4	23.9	10	<0.01	35	2.7	1.75	0.58	15.3	1.91	0.6	0.58	1.9	0.25	0.4	3.9	7	14	0.75	3	1.33	226	<0.1	0.36	0.33	0.41	0.3	292	15	1.81	78	13
MO 059	Amphibolite, Mofj. Gp.	463422	7350136	49.92	15.66	12.68	8.95	7.55	2.18	0.59	1.04	0.17	0.291	0.47	99.57	132	16.5	37.9	150	0.17	34	3.11	1.93	0.87	16.6	3	1.6	0.65	7.5	0.27	2.3	10.4	45	8	2.28	9.1	2.68	256	0.1	0.5	2.17	0.25	0.95	272	16.8	1.86	97	39
MO 099	Amphibolite, Mofjell Gp.	467484	7353908	53.49	15.91	13.3	8.57	3.46	2.93	0.59	0.75	0.25	0.08	0.17	99.53	64.6	9.2	35.2	<10	0.02	8	3	1.88	0.68	16.8	2.31	1	0.61	3.5	0.28	1.1	5.9	<5	5	1.24	5.7	1.96	156.5	<0.1	0.42	0.79	0.27	0.32	379	16.1	1.89	110	27
MO 021	Amphibolite, suprac. Mofj. Gp.	479560	7350580	49.56	16.28	9.76	9.42	8.47	3.59	0.3	0.58	0.22	0.158	0.63	99.02	33.9	25.9	37.4	190	0.08	19	2.61	1.55	0.98	15.5	3.2	1.3	0.52	12.2	0.21	1.4	15.7	56	21	3.51	3.9	3.34	166.5	0.1	0.46	1.83	0.23	0.8	289	13.6	1.45	122	48
MO 022	Amphibolite, suprac. Mofj. Gp.	478951	7351800	51.47	16.48	10.6	7.7	6.31	4.67	0.2	0.39	0.2	0.041	0.99	99.07	42.7	2.4	39.4	30	0.01	110	1.68	1.15	0.37	14	1.2	0.5	0.37	1.6	0.16	<0.2	2.1	29	<5	0.39	0.6	0.8	115.5	<0.1	0.25	0.13	0.18	<0.05	274	9.8	1.11	78	15
MO 025	Amphibolite, suprac. Mofj. Gp.	474385	7352118	51.77	15.01	10.81	8.35	8.69	3.32	0.4	0.41	0.19	0.042	0.82	99.88	49.6	5	36.5	320	0.23	30	1.89	1.29	0.42	13.3	1.4	0.7	0.42	2.5	0.21	0.5	3.1	78	11	0.65	7.2	1	91.5	<0.1	0.28	0.38	0.2	0.13	271	11.1	1.32	128	17
MO 046	Amphibolite, supracr.	466327	7354843	49.12	18.37	12.19	8.36	6.29	3.08	0.33	0.86	0.14	0.086	0.48	99.35	110.5	25.8	39.2	50	0.12	41	3.25	2.07	0.92	17.2	3.33	2.2	0.68	12.5	0.29	3.8	13.5	16	17	3.22	3.4	3	220	0.2	0.54	2.77	0.31	0.74	289	17.5	1.98	99	62
MO 058	Amphibolite, supracr.	463084	7350234	46.45	17.64	9.75	11.13	10.35	2.57	0.26	0.49	0.15	0.011	0.94	99.82	11.6	1.7	50.1	430	0.01	8	1.32	0.78	0.42	12.9	1.05	0.4	0.27	<0.5	0.11	<0.2	1.7	158	<5	0.3	1.9	0.79	182	<0.1	0.19	0.11	0.12	0.05	199	6.9	0.6	54	<2
MO 083	Amphibolite, supracr.	468132	7346813	48.4	17.61	10.98	9.4	7.37	3.84	0.37	0.82	0.17	0.083	0.71	99.78	25.1	3.8	46.3	90	<0.01	9	2.61	1.78	0.6	16.3	1.8	0.8	0.54	<0.5	0.25	0.4	3.3	51	<5	0.61	1.1	1.37	119	<0.1	0.34	0.54	0.24	1.13	327	14.3	1.72	88	20
MO 093	Amphibolite, supracr.	468560	7346607	54.32	17.62	8.81	4.23	4.51	5.44	2.15	0.88	0.26	0.169	0.73	99.23	650	45.1	28	80	1.54	12	3.92	2.35	1.08	18	4.35	2.8	0.78	18.7	0.31	6.6	19.3	43	11	4.77	74.9	3.99	141	0.4	0.65	4.67	0.34	0.59	162	20.2	2.25	91	103
MO 094	Amphibolite, supracr.	468756	7346466	56.22	17.52	8.12	4.55	4.36	4.38	2.53	0.82	0.15	0.17	0.83	99.74	489	45.7	26.7	160	1.06	10	3.84	2.39	0.99	17.2	4.25	3.8	0.83	19.3	0.33	5.7	20	72	13	5.05	90.5	4.08	133.5	0.3	0.66	6.47	0.33	0.88	145	20.2	2.36	83	140
MO 020	Grey gneiss, Mofj. Gp.	479498	7350805	69.51	14.02	5.42	2.19	1.86	3.54	1.9	0.35	0.15	0.061	0.76	99.8	189	18.9	6.9	10	1.29	<5	4.57	3.25	0.82	15.3	3.73	2.5	1.01	9.2	0.54	3.1	10.7	5	50	2.45	40.9	2.89	79	0.2	0.67	2.62	0.51	0.77	45	26.5	3.48	136	81
MO 023	Grey gneiss, Mofj. Gp.	477973	7352060	69.22	14.88	4.6	1.7	1.91	3.08	1.69	0.27	0.2	0.07	1.79	99.49	588	36.5	4.6	10	0.46	28	3.58	2.59	0.73	15.5	3.48	3.2	0.83	20.1	0.47	6.4	14.8	7	88	4.06	49.1	3	107	0.4	0.57	7.49	0.4	4.64	25	21.5	2.85	283	110
MO 024	Grey gneiss, Mofj. Gp.	476043	7351979	70.13	13.21	2.95	4.47	0.55	4.27	1.12	0.25	0.07	0.06	2.6	99.71	170.5	14.4	3.8	10	0.27	6	4.74	3.4	0.67	11.9	3.66	2.3	1.07	7	0.58	2.1	8.7	5	8	1.89	15.6	2.65	115	0.1	0.69	1.76	0.54	0.65	36	29.6	3.57	54	64
MO 047	Grey gneiss	466889	7354110	72.79	12.93	2.42	2.62	1.3	1.51	2.97	0.25	0.05	0.041	1.81	98.79	729	20.2	3.4	10	1.56	11	2.46	1.98	0.56	11.2	2.24	2.5	0.57	10.1	0.35	2.8	8.7	<5	26	2.3	74.6	1.86	114	0.2	0.38	3.87	0.32	1.14	17	16.6	2.22	59	68
MO 048	Grey gneiss	467228	7353523	73.29	13.44	2.61	1.21	1.53	2.71	4.06	0.14	0.06	0.026	0.64	99.79	539	31.5	2.8	10	0.73	<5	3.34	2.68	0.69	13.2	3.01	4	0.8	12.1	0.54	4.1	12.7	<5	29	3.21	69.7	2.77	64.1	0.3	0.5	6.22	0.46	1.33	10	20.4	3.48	72	117
MO 055	Grey gneiss	460740	7350981	70.69	14.54	2.73	2.74	0.74	2.24	4.92	0.31	0.1	0.086	0.69	99.85	415	35.1	2.9	<10	2.01	5	4.16	2.88	0.82	13.6	3.88	3.7	0.92	17.7	0.46	3.4	15.9	<5	12	3.99	77.8	3.44	44.7	0.3	0.63	6.85	0.46	2.48	21	25.5	3.09	50	110
MO 061	Grey gneiss	464172	7349935	66.36	16.59	4.6	1.35	2.7	5.72	1.51	0.38	0.1	0.102	0.51	99.94	121	26.7	3.4	<10	0.38	5	4.11	2.84	0.98	15.8	3.6	3.2	0.91	13.3	0.49	3.1	13.6	<5	10	3.16	29.2	3.03	81	0.2	0.61	4.12	0.47	1.28	24	23.8	3.16	85	93
Geochemical data, Umbukta gabbro and related mafic dykes, Kjerringfjell Group
Sample	Description	UTM_E33	UTM_N33	SiO2	Al2O3	Fe2O3	CaO	MgO	Na2O	K2O	TiO2	MnO	P2O5	LOI	Total	Ba	Ce	Co	Cr	Cs	Cu	Dy	Er	Eu	Ga	Gd	Hf	Ho	La	Lu	Nb	Nd	Ni	Pb	Pr	Rb	Sm	Sr	Ta	Tb	Th	Tm	U	V	Y	Yb	Zn	Zr
AS05-05	Gabbro, Umbukta	481974	7.33617e+06	42.32	12.65	18.3	10.3	6.59	2.15	0.34	6.89	0.17	0.135	-0.16	99.75	110.5	15.8	50.4	20	0.16	108	3.69	1.69	1.69	21.8	4.12	2.4	0.68	6.2	0.17	16.3	13.3	53	<5	2.52	6.5	4.12	450	1.2	0.66	0.52	0.21	0.2	692	16.1	1.25	180	78
AS08-06	Gabbro, Umbukta	482436	7.33512e+06	49	15.1	14.48	7.1	4.13	3.08	1.61	4.09	0.18	0.484	0.59	99.96	437	66.6	34.5	10	0.38	25	7.9	3.78	3.34	27	9.9	9.7	1.41	29	0.41	60	42.2	17	6	9.22	39.4	10.05	548	3.5	1.48	1.41	0.49	0.8	197	35.1	3.11	183	396
AS08-07	Gabbro, Umbukta	482731	7.33581e+06	46.21	11.32	15.45	9.28	14.45	1.59	0.2	0.92	0.2	0.084	0.08	99.9	54.3	8.4	79.2	550	0.09	51	2.26	1.1	0.76	13.1	2.26	1.1	0.4	2.6	0.1	4.9	6.5	395	<5	1.28	4.6	1.96	261	0.2	0.37	0.27	0.15	0.1	132	10.3	0.9	119	32
AS08-08	Pyroxenite	481479	7.33532e+06	46.29	8.61	12.97	10.51	15.61	1.41	0.68	2.25	0.17	0.269	0.79	99.79	163.5	32.9	72.1	1230	0.48	113	4.67	2.05	1.79	14.4	5.86	3.7	0.8	13.6	0.21	19.4	23.2	486	<5	4.85	21.5	6.19	366	1.1	0.85	1.53	0.21	0.49	190	19.7	1.5	124	131
AS08-09	Gabbro, Umbukta	467472	7.34322e+06	52.12	14.11	12.1	8.24	4.98	3.03	1.01	3.27	0.15	0.371	-0.03	99.44	164.5	46.4	36.9	100	1.83	59	7	3.32	2.5	23.7	8.44	6.7	1.26	20.1	0.37	28.5	29.7	54	6	6.48	44.4	8.05	446	1.7	1.32	3.82	0.42	1.29	207	31.7	2.64	174	248
MO 017	Mafic dyke, Kjerringfjell	484881	7339613	47.52	13.4	14.2	9.31	7.38	1.98	0.63	4.11	0.18	0.515	0.39	99.72	158.5	66.7	47.3	200	47.3	43	7.86	3.5	3.49	24.2	10.7	6.7	1.37	31	0.35	33.6	43.3	124	5	9.34	13	10.35	572	2	1.57	1.97	0.42	0.75	250	33.7	2.57	165	261
MO 028	Mafic dyke, Kjerringfjell	486659	7335775	49.04	13.9	13.41	9.27	7.5	2.53	0.46	2.6	0.17	0.286	0.57	99.83	93.6	22.5	40.1	270	40.1	21	4.95	2.29	1.73	19.9	5.26	3.3	0.88	9.8	0.26	16.2	16.8	120	6	3.37	5.4	5.01	345	1	0.87	0.96	0.39	0.4	207	22.5	1.78	140	104
MO 030-1	Gabbro, Umbukta	487131	7336648	51.04	17.75	12.22	6.22	4.85	3.25	1.34	2.31	0.17	0.348	0.15	99.81	824	62.3	31.4	120	0.48	35	5.31	3.04	2.58	23.6	6.73	5.4	1.05	31.5	0.44	30.1	32.3	63	9	7.66	26.3	6.81	369	1.9	0.94	1.86	0.41	0.43	165	26	2.9	157	196
MO 030-2	Mafic dyke, cutting gabbro	487131	7336648	48	13.25	13.86	9.29	7.89	2.25	0.66	3.37	0.17	0.321	0.42	99.59	176.5	30.7	49.2	270	0.4	39	5.21	2.4	2.14	19.4	6.52	4.3	0.94	13	0.26	19.5	22.9	146	<5	4.52	15.3	6.22	435	1.1	1	1.2	0.31	0.31	215	23.9	1.88	152	142
MO 031	Mafic dyke, Kjerringfjell	486824	7337335	48.22	11.92	14.7	7.58	12.77	1.64	0.55	2.03	0.18	0.203	-0.21	99.68	102.5	21.7	65.2	340	65.2	54	4.05	2.06	1.37	15.5	4.39	2.8	0.75	9.1	0.22	12.3	14.5	418	<5	3.03	20.4	3.73	244	0.8	0.69	1.76	0.26	0.51	168	19	1.6	133	82
MO 034	Mafic dyke, Kjerringfjell	484743	7338416	49.1	13.97	12.83	9.08	7.49	2.08	1.14	2.99	0.16	0.455	0.45	99.88	269	47.8	43.6	290	43.6	32	5.77	2.66	2.52	20.9	7.63	6.4	1.05	19.9	0.29	27.1	32.8	149	<5	6.92	40.4	8.09	547	1.5	1.1	1.83	0.35	0.63	191	25.8	2.05	158	252
MO_028769	Gabbro, Umbukta	485167	7.33927e+06	49.5	16.35	10.5	9.61	6.66	3.28	0.54	1.24	0.15	0.15	0.4	98.5	163	19.7	40.7	260	0.33	<5	3.36	1.81	1.42	20.6	3.7	2.4	0.67	8.8	0.2	10.1	12.5	84	<5	2.75	8.4	3.24	426	0.6	0.63	1.24	0.24	0.3	173	16.3	1.43	113	92
MO_028770	Mafic dyke, Kjerringfjell	485696	7.33886e+06	48.4	13.2	15	8.39	9.25	0.91	0.43	3.05	0.21	0.46	0.6	100	98.7	37	49.4	290	0.9	25	6.13	2.93	2.09	20.8	7.39	4.7	1.12	16.1	0.32	30.1	25.3	187	<5	5.36	24.3	6.72	374	1.9	1.15	1.94	0.4	0.74	215	28	2.27	167	186
MO_028772	Gabbro, Umbukta	486102	7.33853e+06	52.6	15.45	11.95	8.73	5.47	2.35	0.92	1.86	0.17	0.21	0.1	99.9	230	43.9	39.5	190	1.6	40	6.09	3.42	1.67	20.9	6.66	2.9	1.2	19.1	0.41	16.2	25	71	7	5.76	30.4	6.26	290	1.1	1.08	4.65	0.45	0.82	270	30.6	2.97	128	97
MO_028776	metagabbro/amphibolite	487347	7.33372e+06	48.5	12.85	14.65	8.56	5.5	2.79	0.56	5.12	0.21	0.51	0.5	99.8	117	50.2	47.5	60	0.24	61	7.17	3.38	2.86	22.8	8.82	6.8	1.29	21.7	0.36	37.2	33.2	57	<5	7.11	15.6	8.79	502	2.5	1.34	2.05	0.41	0.92	408	32	2.57	171	253
MO_028777	Gabbro, Umbukta	481474	7.33541e+06	49.5	14.85	12.05	9.19	7.52	3.18	0.84	1.88	0.16	0.25	0.3	99.8	280	25.9	47.4	280	1.09	40	3.95	1.93	1.55	20.9	4.48	2.8	0.71	12.3	0.22	20.1	14.6	147	<5	3.26	21.9	4.03	421	1.3	0.71	1.56	0.26	0.39	231	18.4	1.62	108	100
P5.1	Mafic dyke, Kjerringfjell	485155	7338781	57	12.85	10.6	7.3	5.66	2.68	0.81	1.96	0.14	0.21	0.41	99.68	112	27.4	37	160	1.36	15	4.62	2.32	1.92	18.9	4.86	2.9	0.9	13.3	0.31	17.3	18	91	12	3.64	27.5	5.33	306	1.2	0.75	2.14	0.34	0.99	190	22.7	2.02	109	110
P5.2	Gabbro, Umbukta	485193	7338574	58.4	16.9	7.9	5.19	4.02	3.53	1.49	1.49	0.09	0.19	0.36	99.63	184	38.4	25	130	3.22	29	4.37	2.83	2.09	20.5	4.24	6.6	0.89	20.2	0.48	14.9	19.4	84	14	4.83	76.9	4.35	302	1	0.69	5.61	0.43	1.77	113	24.5	3.03	93	256
P6.1	Gabbro, Umbukta	485972	7338503	48.5	13.1	12.8	9.71	8.96	2.53	0.59	2.81	0.16	0.35	0.39	100.01	282	47.8	47	450	0.37	43	7.13	3.32	3.58	25.2	8.38	4.9	1.25	21.6	0.39	32.7	32.9	200	9	6.67	16.6	9.34	552	2.1	1.26	2.93	0.49	0.77	306	33.2	2.5	130	206
P6.3	Gabbro, Umbukta	485990	7338443	55.1	16.2	11.45	6.56	3.9	2.78	1.92	2.16	0.15	0.3	0.18	100.78	431	79.9	28	90	4.15	23	7.94	4.31	2.71	25.2	8.21	5.6	1.51	39.4	0.65	27.4	40.8	26	12	9.99	83.7	9.88	287	1.9	1.31	8.89	0.59	1.92	222	40.7	3.98	122	224
P6.4	Gabbro, Umbukta	487351	7338543	55.5	16.75	9.91	8.88	6.26	1.88	0.53	1.44	0.13	0.18	0.34	101.87	252	42.5	35	290	2.55	21	4.49	2.75	1.83	21.4	5.14	3.3	1.03	22.6	0.4	14	23.2	84	7	5.5	39.9	6	261	1.1	0.84	5.46	0.4	1.32	183	28.5	2.28	99	120
P7.2	Mafic dyke, Kjerringfjell	486113	7338491	49.5	12.8	13.45	9.12	9.5	2.02	0.48	2.97	0.17	0.41	0.08	100.6	187	40.2	54	270	0.32	44	5.75	2.54	2.14	19.4	7.34	4.5	1.01	18.2	0.24	26.7	27.7	245	4	6.04	14.9	6.38	440	1.7	1.01	2.32	0.37	0.73	210	26	1.86	132	180
P7.4	Gabbro, Umbukta	487351	7338543	47.4	10.05	14.2	8.1	15	1.75	0.58	1.88	0.18	0.22	-0.25	99.23	182	28.6	71	470	0.35	57	4.22	2.13	1.52	16.4	4.9	3.1	0.77	12.8	0.21	19.6	17.7	492	8	4.12	16.2	4.53	335	1.1	0.75	1.89	0.32	0.49	191	21	1.67	122	130
P9.4	Gabbro, Umbukta	487909	7339147	48.3	12.55	14.65	9.96	10.6	2.07	0.3	2.78	0.2	0.21	-0.1	101.62	118	18.4	60	380	0.15	43	4.1	2.17	1.42	17.3	4.6	2	0.76	8.6	0.21	15.6	13.3	269	3	2.83	5.8	3.77	364	1.2	0.68	0.77	0.26	0.22	196	18.6	1.43	128	80
UM1A	Mafic dyke, cutting gabbro	481390	7337541	49.4	13.85	13.2	9.25	8.76	3.61	0.51	1.92	0.18	0.23	0.35	101.35	173.5	17.2	47	320	0.52	55	4.19	1.98	1.48	20.2	4.82	2.7	0.78	7.3	0.22	14.7	13	160	2	2.56	8.7	3.78	355	1.2	0.79	1.05	0.25	0.49	213	19.5	1.48	136	90
UM1D	Gabbro, Umbukta	481390	7337541	49.5	15.3	10.85	11	7.07	2.99	0.45	2.02	0.14	0.25	0.92	100.58	164	25.4	40	160	1.31	51	4.53	2.19	1.79	18.5	5.4	3.8	0.85	11.8	0.23	22.1	18.4	111	2	3.76	13.6	4.54	459	1.7	0.76	1.08	0.28	0.36	162	20.8	1.63	92	152
UM46	Gabbro, Umbukta	488127	7336112	45.4	10.3	16.7	7.08	18.9	1.51	0.26	1.09	0.21	0.12	-0.59	101.02	79.3	11.6	99	210	0.24	52	2.46	1.16	0.81	12.6	2.35	1.1	0.5	5.3	0.16	7.6	7.8	604	4	1.62	7.5	1.96	172.5	0.9	0.45	0.66	0.17	0.18	144	12.5	1.13	134	52
UM5	Gabbro, Umbukta	481387	7336546	50.5	14.5	11	10.4	7.8	2.52	0.53	1.91	0.15	0.23	0.56	100.22	151	26.6	40	460	0.81	39	4.27	1.88	1.59	18.4	5.04	3.2	0.73	12.2	0.19	16	18.1	136	<2	3.76	11.9	4.98	424	0.8	0.67	0.8	0.31	0.4	195	20	1.61	92	125
UM61	Gabbro, Umbukta	482451	7336086	49.2	14.65	11.9	10.1	7.81	3.17	0.7	2.2	0.16	0.3	0.06	100.37	185	32.3	44	380	0.49	39	4.91	2.43	1.85	21	6.06	3	0.9	14.3	0.25	23	22.6	116	2	4.85	16.4	5.12	457	1.5	0.94	1.44	0.29	0.42	199	22.7	1.63	114	119
Major elements in weight%, trace elements in ppm.
Coordinates are UTM zone 33, WGS84.
